# Supplementary material for: Robust and accurate prediction of residue–residue interactions across protein interfaces using evolutionary information
Source: eLife. 2014 May 1;3:e02030. doi: 10.7554/eLife.02030 (PMC4034769; doi:10.7554/eLife.02030)
Supplement: Figure 2—source data 1. — The PDB id and chains in the benchmark set, with number of sequences per length (seq/len) in the multiple sequence alignment. For complexes involving more than one component, an all vs all analysis was performed. DOI: http://dx.doi.org/10.7554/eLife.02030.006 [file elife02030s001.xls]

## Sheet: Sheet1
PDB	Chains	seq/len		PDB	Chains	seq/len		PDB	Chains	seq/len
1B70	A_B	1.1		1W85	A_BD	2.3		3G5O	AD_BC	5.3
1BXR	A_B	0.7		1ZUN	A_B	1		3IP4	A_B	0.8
1EFP	A_B	2.5		2D1P	BEH_CFI	1		3IP4	A_C	1.5
1EP3	A_B	1		2NU9	A_BEG	1.2		3IP4	B_C	1.2
1I1Q	A_B	1.8		2ONK	A_C	10.3		3MML	A_B	2.3
1IXR	AB_C	1.9		2VPZ	A_B	0.8		3OAA	H_G	2.12
1QOP	A_B	1.8		2WDQ	C_D	0.9		3PNL	A_B	1.7
1RM6	A_B	1.5		2Y69	A_B	2		3RPF	A_D	3.9
1RM6	A_C	1.7		2Y69	A_C	1.1		3RRL	A_BD	3.1
1RM6	B_C	3.2		2Y69	B_C	2.9		4HR7	AB_I	1.5
1TYG	A_B	2.4		3A0R	A_BD	14.8
PDB	Chains	seq/len		PDB	Chains	seq/len		PDB	Chains	seq/len
4HEA	1_2	2.92		4HEA	3_J	1.45		4HEA	6_N	2.69
4HEA	1_3	1.78		4HEA	3_K	2.04		4HEA	9_A	3.98
4HEA	1_4	1.55		4HEA	3_L	1.42		4HEA	9_H	3.31
4HEA	1_5	1.98		4HEA	3_M	1.53		4HEA	9_J	3.98
4HEA	1_6	2.1		4HEA	3_N	1.54		4HEA	9_K	4.93
4HEA	1_9	3.12		4HEA	4_5	2.84		4HEA	9_L	2.15
4HEA	1_A	1.59		4HEA	4_6	3.43		4HEA	9_M	2.62
4HEA	1_H	1.5		4HEA	4_9	3.01		4HEA	9_N	2.67
4HEA	1_J	1.52		4HEA	4_A	2.03		4HEA	A_H	6.61
4HEA	1_K	1.97		4HEA	4_H	2.21		4HEA	A_J	4.89
4HEA	1_L	1.27		4HEA	4_J	2.01		4HEA	A_K	13.36
4HEA	1_M	1.45		4HEA	4_K	2.35		4HEA	A_L	4.82
4HEA	1_N	1.45		4HEA	4_L	1.58		4HEA	A_M	5.36
4HEA	2_3	2.16		4HEA	4_M	1.84		4HEA	A_N	6.69
4HEA	2_4	2.25		4HEA	4_N	1.89		4HEA	H_J	2.74
4HEA	2_5	4.08		4HEA	5_6	4.65		4HEA	H_K	6.38
4HEA	2_6	4.02		4HEA	5_9	4.68		4HEA	H_L	3.76
4HEA	2_9	3.56		4HEA	5_A	4.94		4HEA	H_M	4.05
4HEA	2_A	3.8		4HEA	5_H	3.41		4HEA	H_N	4.87
4HEA	2_H	2.44		4HEA	5_J	4.37		4HEA	J_K	5.4
4HEA	2_J	3.17		4HEA	5_K	5.78		4HEA	J_L	2
4HEA	2_K	4.65		4HEA	5_L	2.07		4HEA	J_M	2.34
4HEA	2_L	1.78		4HEA	5_M	2.54		4HEA	J_N	2.46
4HEA	2_M	2.26		4HEA	5_N	2.73		4HEA	K_L	5.06
4HEA	2_N	2.2		4HEA	6_9	4.4		4HEA	K_M	5.66
4HEA	3_4	1.71		4HEA	6_A	3.38		4HEA	K_N	6.71
4HEA	3_5	1.97		4HEA	6_H	3.13		4HEA	L_M	3.64
4HEA	3_6	2.42		4HEA	6_J	3.48		4HEA	L_N	3.65
4HEA	3_9	2.71		4HEA	6_K	4.1		4HEA	M_N	4.07
4HEA	3_A	1.53		4HEA	6_L	2.04
4HEA	3_H	1.61		4HEA	6_M	2.44
