# Supplementary material for: Robust and accurate prediction of residue–residue interactions across protein interfaces using evolutionary information
Source: eLife. 2014 May 1;3:e02030. doi: 10.7554/eLife.02030 (PMC4034769; doi:10.7554/eLife.02030)
Supplement: Figure 4—source data 1. — The iRMSD of the lowest energy structure and the fraction of native contacts in the positive control. DOI: http://dx.doi.org/10.7554/eLife.02030.009 [file elife02030s002.xls]

## Sheet: Sheet1
Complex	iRMSD	Fnat		Complex	iRMSD	Fnat		Complex	iRMSD	Fnat
1qopAB	0.2	0.99		2y69AC	0.5	0.97		1bxrAB	0.6	0.95
1rm6AC	0.2	0.97		3oaaHG	0.5	0.96		2wdqCD	0.6	1
1efpAB	0.2	0.97		1rm6BC	0.5	0.97		4hea46	0.7	0.98
3rrlAB	0.3	1		1b70AB	0.5	0.97		2y69AB	0.8	0.94
1ep3AB	0.3	0.97		4hea45	0.5	0.97		1i1qAB	0.8	0.92
1w85AB	0.3	0.99		4hea69	0.5	0.98		4heaJN	0.9	0.93
3rpfAD	0.3	0.97		4heaAH	0.5	0.99		4heaAJ	0.9	0.96
1tygBA	0.3	0.97		2nu9AB	0.5	0.96		3a0rAD	0.9	0.94
3mmlAB	0.4	0.97		3ip4AC	0.5	0.97		4hea9H	1	0.96
2onkAC	0.4	0.99		3pnlAB	0.5	0.95		4heaHJ	1.1	0.88
3ip4BC	0.4	0.97		4heaJK	0.5	0.97		4hea6A	2.6	0.64
4heaKN	0.4	0.97		1rm6AB	0.5	0.96		3g5oAB	2.7	0.78
4heaMN	0.4	0.98		1zunAB	0.5	0.93		4heaAK	5.1	0.33
4heaLN	0.5	0.98		4heaLM	0.6	0.96
